# Supplementary material
Source: publisher site journal article supplement (https://www.spandidos-publications.com/4611/downloadSupplementary)
Supplement: Supplementary file 1 [file downloadSupplementary]

Table SI. Clinical characteristics of 66 patients with prostate cancer.

| Clinical characteristics | Number of patients |
|--------------------------|--------------------|
| Age at surgery, years    |                    |
| ≤65                      | 15                 |
| >65                      | 51                 |
| Gleason score            |                    |
| ≤7                       | 24                 |
| >7                       | 42                 |
| pT stage                 |                    |
| pT2a-pT2c                | 35                 |
| pT3a-pT4                 | 31                 |
| N stage                  |                    |
| N0                       | 45                 |
| N1                       | 21                 |

pT, pathological T.
